# Supplementary material
Source: publisher figshare collection journal article supplement (https://sage.figshare.com/ndownloader/files/12370256)
Supplement: Supplementary file 1 [file 12370256]

Table 1 Supplement: Key Early Adopters of Participatory Budgeting

| <b>City</b>       | <b>Year</b> | <b>Description</b>                                                                                     |
|-------------------|-------------|--------------------------------------------------------------------------------------------------------|
| Boston, MA        | 2014        | Youth Lead the Change, first citywide youth PB process                                                 |
| Cambridge, MA     | 2014        | Citywide process, relying on new revenues                                                              |
| Chicago, IL       | 2009        | Alderman Joe Moore began PB process in his ward, first PB adoption in the U.S.                         |
| Greensboro, NC    | 2016        | Multi-year effort by grassroots group culminating in PB process.                                       |
| New York City, NY | 2011        | Most well-developed elected official program, with processes in more half of council districts by 2017 |
| Oakland, CA       | 2017        | Community Development Block Grant voting in two council districts                                      |
| Vallejo, CA       | 2012        | First citywide process, using 30% of sales tax increase passed after bankruptcy                        |

*Note:* There is some inconsistency in the literature on start years, depending on whether the start of a process or the voting period is used. *Sources:* Participatory Budgeting Project resources and Public Agenda reports.
